# Supplementary material for: Comparative Transcriptomic Analysis Reveals Divergent Host Cell Responses to Classical and Variant Pseudorabies Virus Strains
Source: MDPI journal article supplement (doi:10.3390/vetsci13030226), 2026-02-27
Supplement: s1 [file supplementary Table S1.pdf › supplementary Table S1.pdf]

**Supplementary Table S1** Detailed information of primers used in the present study

| Primer name            | Primer sequences       | Genbank Accession No. |
|------------------------|------------------------|-----------------------|
| <i>GAPDH</i> -qPCR-F   | AGGGCATCCTGGCTACACT    | XM_008973731.2        |
| <i>GAPDH</i> -qPCR-R   | TCCACCACCCTGTTGCTGTA   |                       |
| <i>NLRP3</i> -qPCR-F   | CAGGCTTCTGGGACACCTT    | NM_001256770.2        |
| <i>NLRP3</i> -qPCR-R   | TCAGAGTCCCAGGGCATAGG   |                       |
| <i>NLRP11</i> -qPCR-F  | GCCTGAATTGTGTGCCCCAT   | XM_021095069.1        |
| <i>NLRP11</i> -qPCR-R  | CAGCAGAAGAGCAACCTCAGAT |                       |
| <i>TNFSF15</i> -qPCR-F | AAGGACAGGAACCTTGACCT   | NM_001244555.1        |
| <i>TNFSF15</i> -qPCR-R | TCATCCGGTTCTTGGTGAAGG  |                       |
| <i>CCNE1</i> -qPCR-F   | GATGGTGCTTGCAAGTGAAGA  | XM_005653265.2        |
| <i>CCNE1</i> -qPCR-R   | CGATGGCTAGAATGCACAGA   |                       |
| <i>PTPN22</i> -qPCR-F  | GTGGTCGAGGAACTGGAGAA   | XM_021090719.1        |
| <i>PTPN22</i> -qPCR-R  | GATCTGAGTTGGGACTCTGGA  |                       |
| <i>CXCL10</i> -qPCR-F  | CGGCACTACTGATAAGGATGG  | NM_001008691.1        |
| <i>CXCL10</i> -qPCR-R  | TGCTCAACAGCTCGGGATG    |                       |
| <i>CYP11A1</i> -qPCR-F | CATCCGGGACATCACAGACAG  | NM_214412.1           |
| <i>CYP11A1</i> -qPCR-R | GCTGGGATTTGTACCAGGTA   |                       |
| <i>haspin</i> -qPCR-F  | AAGCCTGGGATCGCTACAAC   | XM_021067684.1        |
| <i>haspin</i> -qPCR-R  | TCGATCCCGCCAACTCAAA    |                       |
| <i>PCNA</i> -qPCR-F    | CTGCAGATGTACCCCTTGTGT  | NM_001291925.1        |
| <i>PCNA</i> -qPCR-R    | CCGAAGCAGTTCTCAAAGAGC  |                       |
| <i>TRIM40</i> -qPCR-F  | AGCAGGAGAAACCGAGGTGTA  | NM_001160087.1        |
| <i>TRIM40</i> -qPCR-R  | AAACCACCATCTGCCACGA    |                       |
